# Supplementary material for: Overview of tRNA Modifications in Chloroplasts
Source: MDPI journal article supplement (doi:10.3390/microorganisms10020226), 2022-01-20
Supplement: s1 [file s1]

## Supplemental Tables and Figures

### Overview of tRNA modifications in chloroplasts

*Fages-Lartaud et al. 2022*

**Supplemental Table S1:** List of tRNAs found in the chloroplast of *Chlamydomonas reinhardtii*..... p2

**Supplemental Figure S1:** Secondary structure and potential modifications of tRNAs from the chloroplast of *Chlamydomonas reinhardtii*..... p3-5

**Supplemental Table S1:** List of tRNAs found in the chloroplast of *Chlamydomonas reinhardtii*.(source: <http://plantrna.ibmp.cnrs.fr/plantrna>)

|                      |                                                                                                |
|----------------------|------------------------------------------------------------------------------------------------|
| tRNA-Ala<br>(GCA)    | GGGGATATAGCTCAGTTGGTAGAGCGCTGCCTTTGCAAGGCAGATGTCAGCGGTTCAATCCGCTTATCTCCACCA                    |
| tRNA-Arg<br>(AGA)    | GGGTTTCATCGTTCAATGGATAGGACAGCGGCCTTCTAAGCCGTCAATGTAGGTTGATTCTACTGGGCCTGCCA                     |
| tRNA-Arg<br>(CGT)    | GAGCTTGTAGCTCAGTGGACTAGAGCACATGGCTACGAACCATGGGGTCGGGGGTTGAAACCTCCTGGCTCGCCA                    |
| tRNA-Asn<br>(AAC)    | TCTTCAGTAGCTCAGTGGTAGAGCGATCGGCTGTAAACCGATTGGTCGTAGGTTCAAGTCTACCTGGGAGTCCA                     |
| tRNA-Asp<br>(GAC)    | GGGATTGTAGTTCAATTGGTTAGAGCACCGCCTGTCACGGCGGAAGTTGCGGGTTCGAGTCCCGTCAATCCCGCCA                   |
| tRNA-Cys<br>(TGC)    | GGCGGCATAGCAAGCGGTAAGGCCGTGGATTGCAAATCTCTATTCCCCAGTTCAAATCTGGGTGCCGCCTCCA                      |
| tRNA-Gln<br>(CAA)    | TGGGGCGTCGCCAAGTGGTAAGGCTGCGGTTTTTGGTACCGCCATTCGCAGGTTCAATCCTTCCGCCCCAGCCA                     |
| tRNA-Glu<br>(GAA)    | GCCCCATCGTCTAGAGGCCTAGGACACCTCCCTTTCACGGAGAAAACGCGGATTCAATTCGCTGGGGGTACCA                      |
| tRNA-Gly<br>(GGC)    | GCGGACATAGCTCAATGGTAGAGTATTTCTTGCCAAGGAAAATGTTGCGGGTTCGACTCCCGTTGTCCGCTCCA                     |
| tRNA-Gly<br>(GGA)    | GCGGATGTAACCTCAATCGGTAGAGTGCGATCCTTCCAAGTTCGAGGTTGTGGGTTGAGTCCCATCATCCGCTCCA                   |
| tRNA-His<br>(CAC)    | GGCGGGCGTAGCCAAGTGGTAAGGCAGTGGATTGTGACTCCACTATTCGCGGGTTCGAACCCCGTCGTTGCCCCA                    |
| tRNA-Ile<br>(ATA)    | GCACTGTTGGCCGAGCGGATGAGGCAAACGACTCATAATCGTTATAAGGTAGGTTCAACTCCTATACGGTGCACCA                   |
| tRNA-Ile<br>(ATC)    | GGGCTATTAGCTCAGTTGGTTAGAGCGTTGCTTTGATAAGGCAAAAGTCGAAAGTTCAAATCTTTCATAGCCCACCA                  |
| tRNA-Leu<br>(TTA)    | GGGGATATGGCGGAATGGTAGACGCTACGGACTTAAATCCGTTCTTGTGCGAACAAGGTGAGGGTTCAAGTCCCTC<br>TTTCCCCACCA    |
| tRNA-Leu<br>(CTA)    | GCCTTCGTGATGGAACCTGGTAGACATCCTGGTTTTAGGAACCAAGTCTGCTGAAAGGCGTGCCGGTTCAAATCCGGCCGAA<br>GGCACCA  |
| tRNA-Lys<br>(TTT)    | GGGTTGCTAACTCAATGGTAGAGTACTCGGCTTTTAACCGATAAGTTCTGGGTTGAGTCCCAGGTAACCCACCA                     |
| tRNA-Met-<br>e (ATG) | GCCTGCTTAGCTCAGTTGGTTAGAGCGTCCGTTTCATAAGCTGATTGTCACTAGTTCAAATCTAGTAGCAGGCACCA                  |
| tRNA-Met-<br>i (ATG) | AGCAGGGTAGAGCAGTCTGGTAGCTCGTGGGGCTCATAATCCTGAGGTCGCAGGTTCAAATCCTGCCCTGCCACCA                   |
| tRNA-Phe<br>(TTC)    | GCCGGGATAGCTCAGTTGGTAGAGCAAAGCGTTGAAAATGCTTGGGTCACCGGTTCAAGTCCGGTTCCTGGCACCA                   |
| tRNA-Pro<br>(CCA)    | CGGGATGTAGCGCCAGCTTGGTAGCGCATGTGCTTTGGGAGCATAGGGTCGCAGGTTCAATCCTGTCATCCCGACCA                  |
| tRNA-Ser<br>(TCA)    | GGAAAGGTGGCAGAGTGGTTAATTGCACCAATTTTGAAAATTGGCGTGGCTTCGCGGTCACCGAGGGTTCAATCCCT<br>CCCTTTCCGCCA  |
| tRNA-Ser<br>(AGC)    | GGAGAGATGGCTGAGTGGTCGAAAGCGGCTGATTGCTAATCAGTTTAAGTGCGACTTGCGCTTACGAGGGTTCAAT<br>CCCTCTCTCCGCCA |
| tRNA-Thr<br>(ACA)    | GCTTGCTTAACTCAATCGGTAGAGTATCGGTTTTGTAAACCGAAGGTTATCGGTTCAACTCCGATAGCAAGCTCCA                   |
| tRNA-Trp<br>(TGG)    | ACGTCCTTAGTTCAGTCGGTAGAACGCAGGTTTCCAAAACCTGATGTCGTGGGTTCAATTCCTACAGGGCGTGCCA                   |
| tRNA-Tyr<br>(TAC)    | GGGTCGATGCCCGAGTGGTTAATGGGGGCGGATTGTAAATCCGTTGACTTAGTCTGCGTTGGTTCAATCCGACTCGA<br>CCCACCA       |
| tRNA-Val<br>(GTA)    | AGGCCCATAACTCAGTCGGTAGAGTGATTGCCTTACAAGCAATAGGTCATCGGTTCAAGTCCGGTTGGGCCTACCA                   |

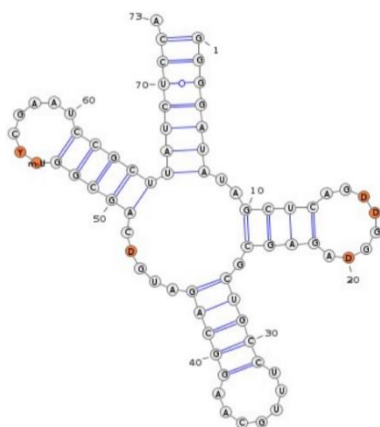

**1.Ala\_TGC**

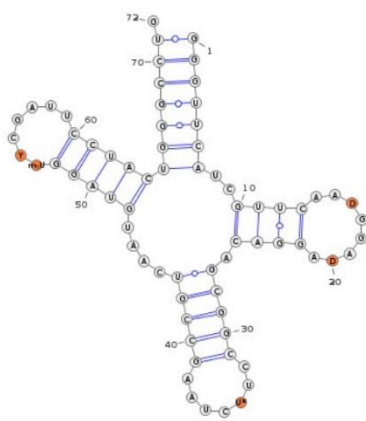

**2.Arg\_TCT**

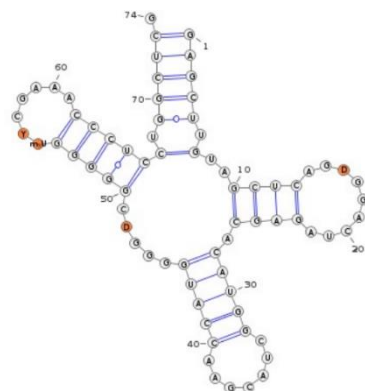

**3.Arg\_ACG**

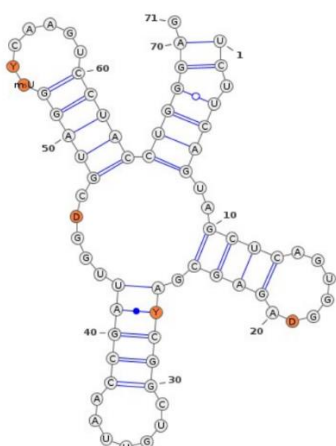

**4.Asn\_GTT**

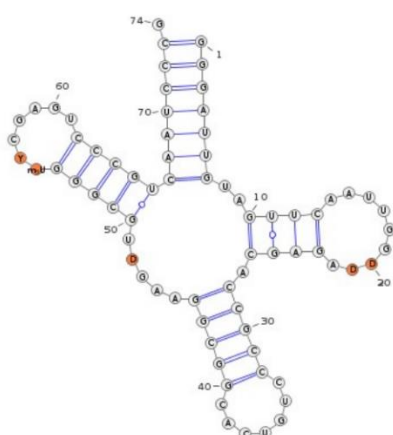

**5.Asp\_GTC**

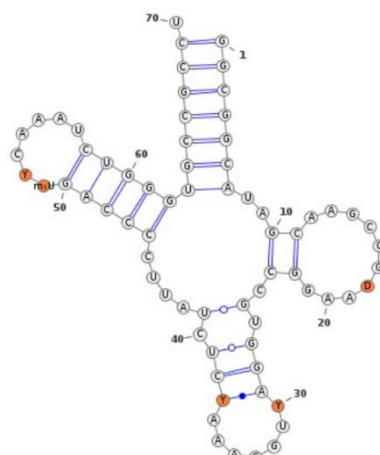

**6.Cys\_GCA**

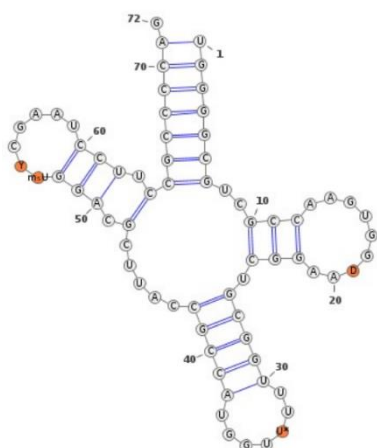

**7.Gln\_TTG**

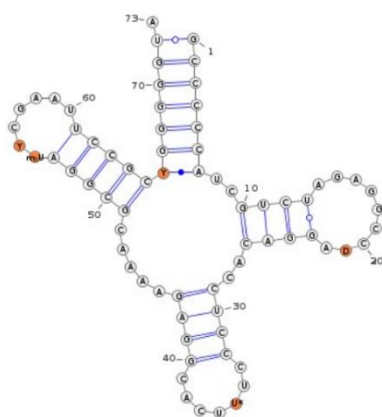

**8.Glu\_TTC**

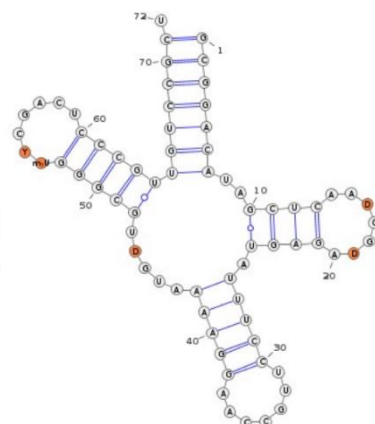

**9.Gly\_GCC**

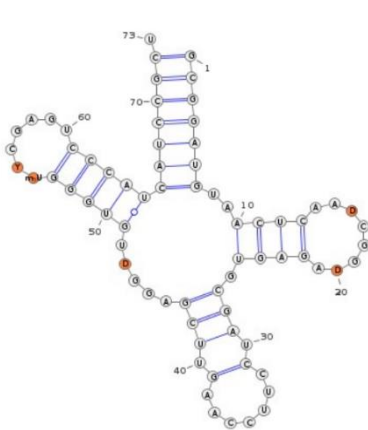

**10.Gly\_TCC**

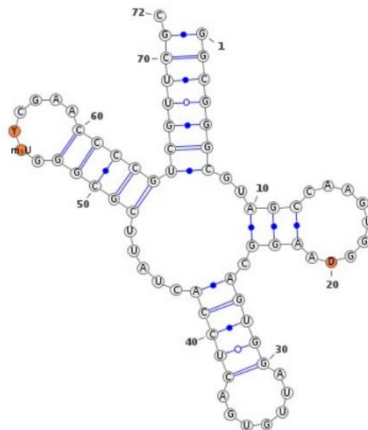

**11.His\_GTG**

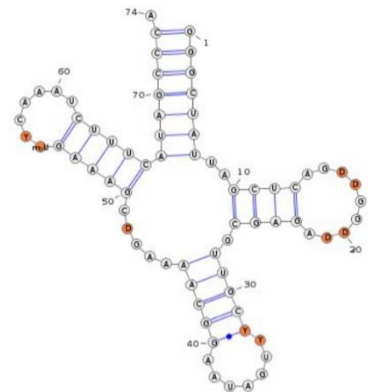

**13.Ile\_GAT**

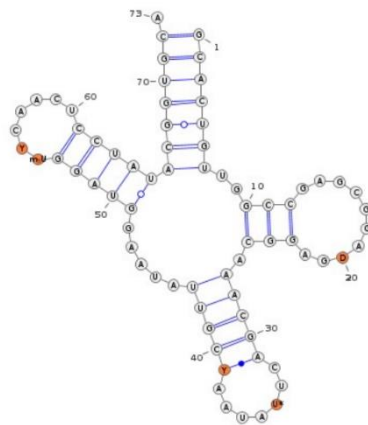

**1.Ile\_TAT**

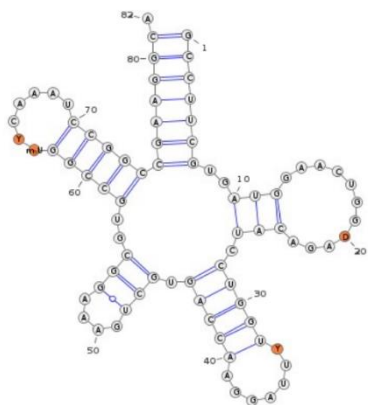

**15.Leu\_TAG**

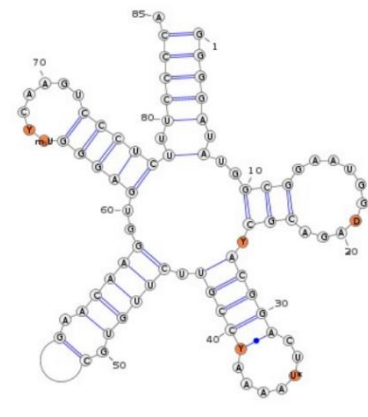

**14.Leu\_TAA**

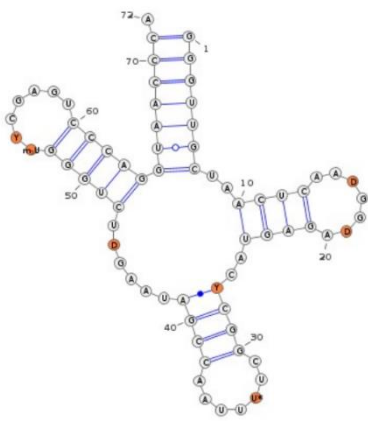

**16.Lys\_TTT**

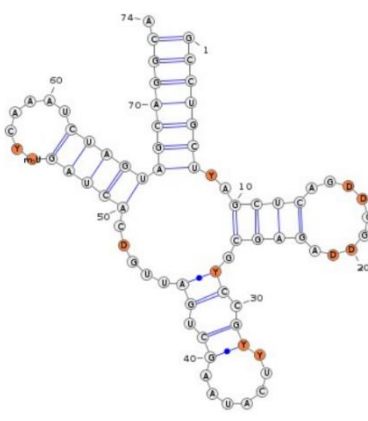

**17.Met\_CAT\_e**

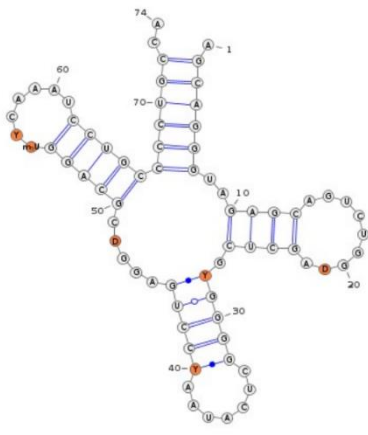

**18.Met\_CAT\_i**

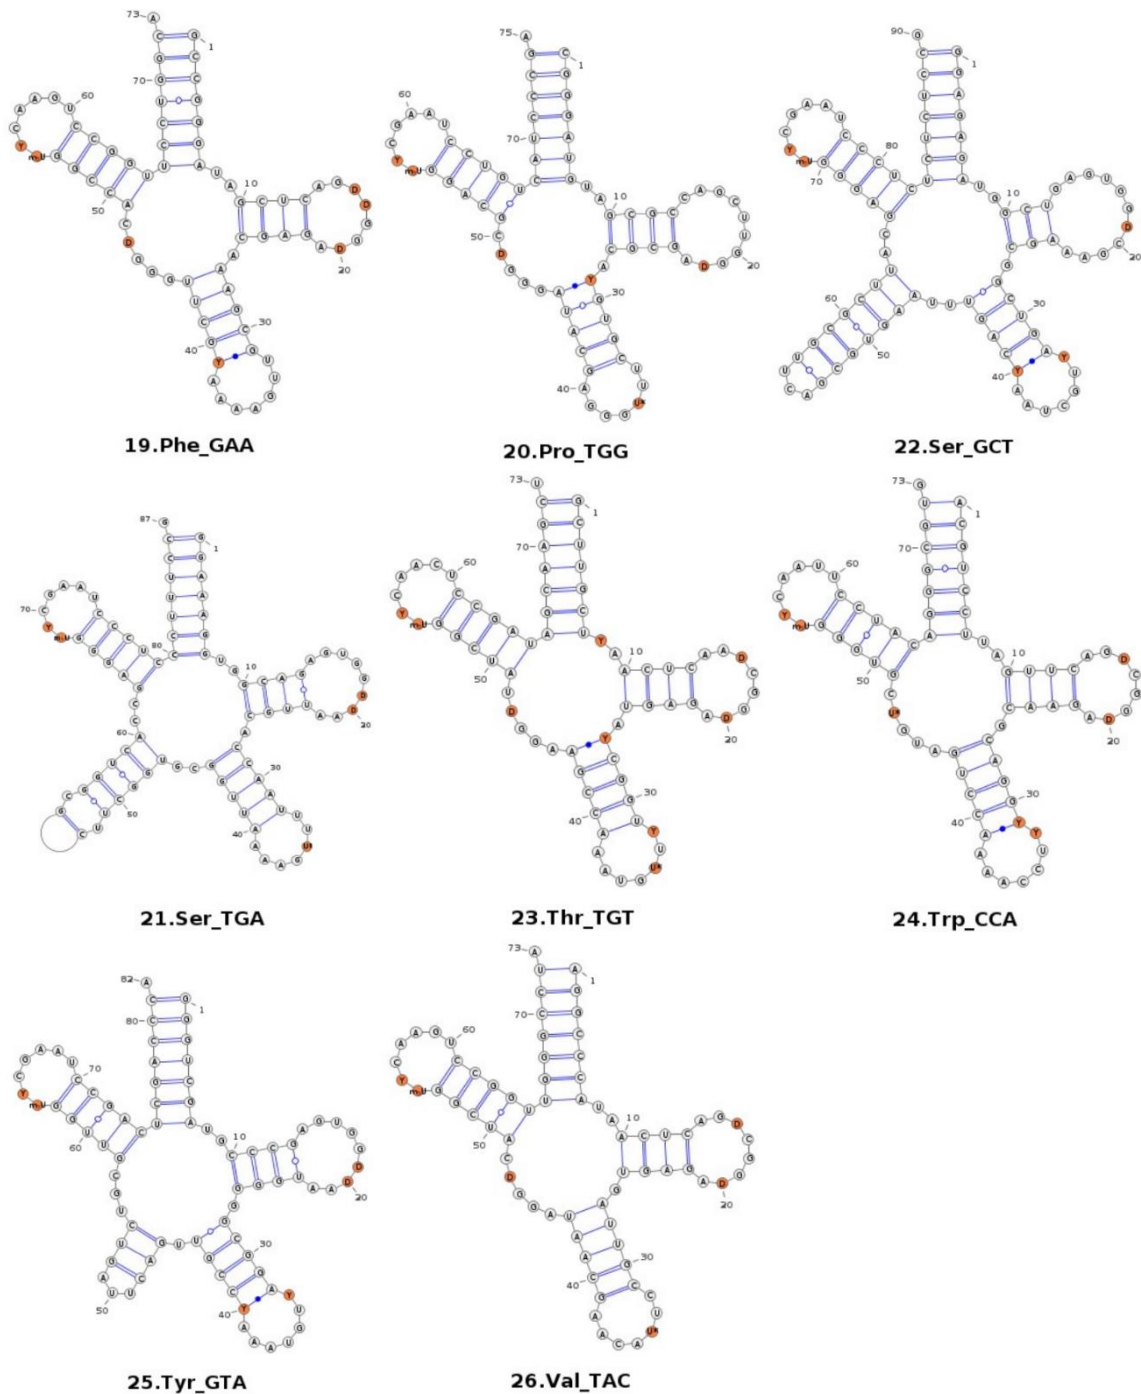

**Supplemental Figure S1:** Secondary structure and potential modifications of tRNAs from the chloroplast of *Chlamydomonas reinhardtii*. The anticodon of the tRNAs appears next to the encoded amino acid below each structures. Modifications are highlighted in orange and changed to their potential new nucleoside. The outcome of modified bases might contain errors due to the computation program used. Computed with tRNAmoD (<https://webs.iitd.edu.in/raghava/trnamod/index.html>).
